# Supplementary material for: Subcutaneous preconditioning increases invasion and metastatic dissemination in mouse colorectal cancer models
Source: PubMed Central journal article supplement (PMC3944498; doi:10.1242/dmm.013995), 2014-01-30
Supplement: supp_7.3.387_DMM013995.pdf [file supp_7.3.387_DMM013995.pdf]

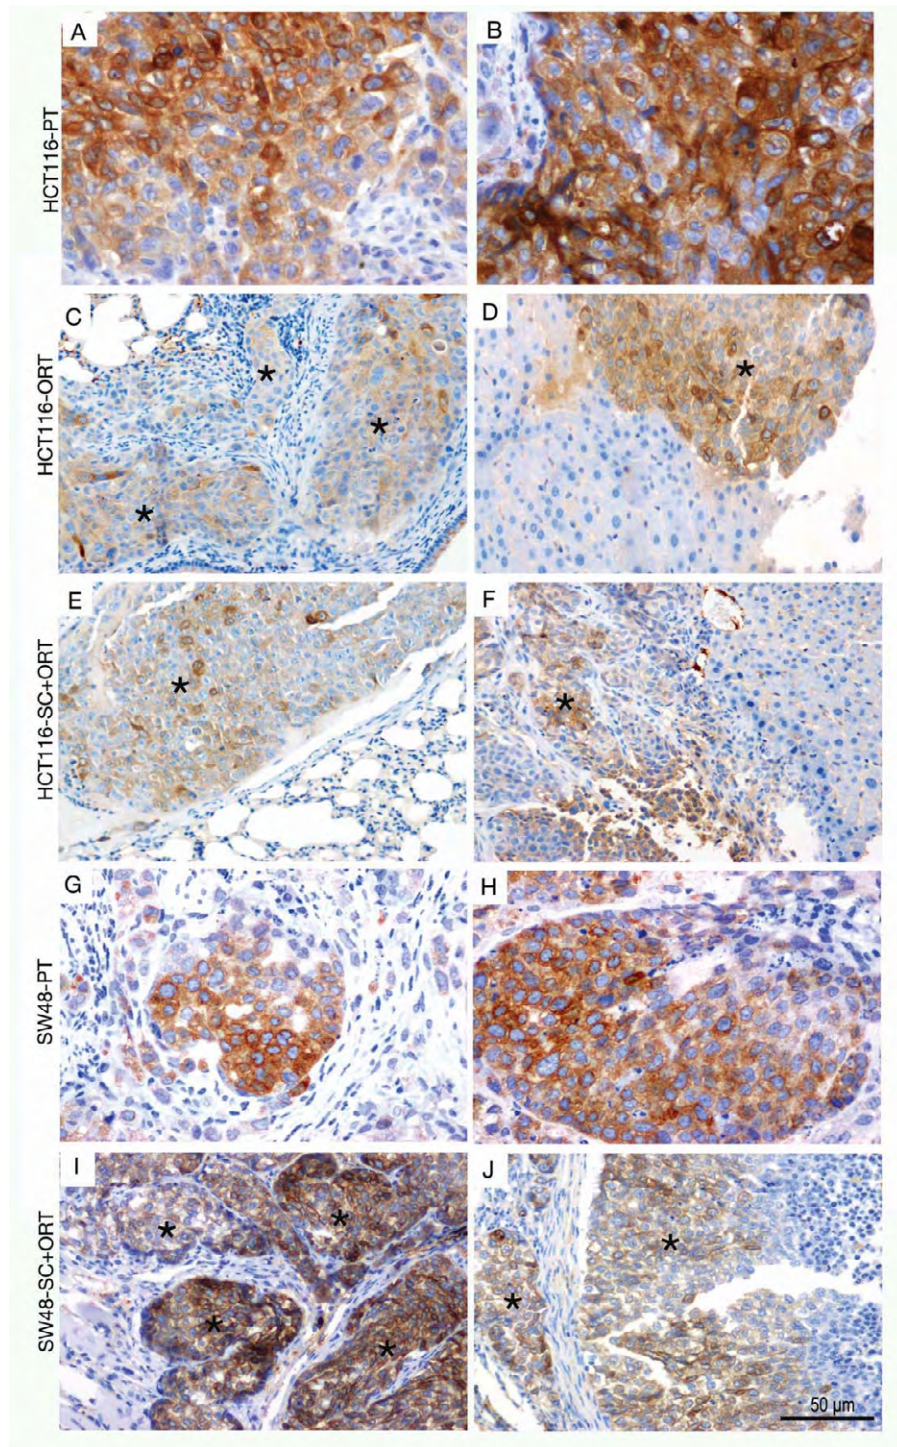

**Figure S1. Primary tumours and metastatic foci in HCT116 and SW48 mice express a human specific marker.** Primary tumours (A and B) and metastatic foci that developed in lung (C, E) or liver (D, F) in the ORT and SC+ORT group of HCT116 mice expressed anti MHC class I marker, confirming that metastases derived from human CRC cells. Expression of this marker was also observed in primary tumours from SW48 ORT (G) and SW48 SC+ORT (H) and in metastatic foci in diaphragm (E) and mesentery (F) in mice from the SW48 SC+ORT group. Scale bars for magnification (A-H all have the same magnification).

**Table S1.** Quantitation of VEGFA protein expression in primary tumour observed by Elisa in HCT-116-derived SC+ORT and ORT groups.

| <b>Antibody</b> | <b>HCT116 Group</b> | <b>pgVEGFA/ug primary tumour protein (mean <math>\pm</math>SE )</b> |
|-----------------|---------------------|---------------------------------------------------------------------|
| VEGFA           | ORT                 | <b>3.7<math>\pm</math> 0.7<sup>a</sup></b>                          |
|                 | SC+ORT              | <b>14.2<math>\pm</math> 2.8<sup>a</sup></b>                         |

Statistically significant differences observed between groups after applying the Mann-Whitney test: <sup>a</sup>  $p=0.004$

**Table S2.** Quantification of AKT-P and Integrin  $\beta$ 1 protein expression in primary tumours observed by IHC in HCT-116 and SW48-derived SC+ORT and ORT groups.

| Cell line | Group  | Protein expression in primary tumour (mean $\pm$ SE ) |                               |
|-----------|--------|-------------------------------------------------------|-------------------------------|
|           |        | AKT-P                                                 | Integrin $\beta$ 1            |
| HCT116    | ORT    | 17.7 $\pm$ 8.3 <sup>a</sup>                           | 191.7 $\pm$ 19.8 <sup>b</sup> |
|           | SC+ORT | 70.0 $\pm$ 4.4 <sup>a</sup>                           | 68.5 $\pm$ 25.1 <sup>b</sup>  |
| SW48      | ORT    | No expression                                         | No expression                 |
|           | SC+ORT | No expression                                         | No expression                 |

Abbreviation: ORT, model generated by direct injection of HCT116 and SW48 cells in the cecum; SC+ORT, model generated by injection into the cecum of HCT116-SC and SW48-SC cells obtained by disaggregation of previously generated subcutaneous tumours (SC preconditioning); data expressed as mean  $\pm$  standard error. Statistically significant differences observed between groups after applying the Mann-Whitney test: <sup>a</sup>  $p=0.009$ , <sup>b</sup>  $p=0.008$
